# Supplementary material for: Metagenomic and Antibiotic Resistance Analysis of the Gut Microbiota in Larus relictus and Anatidae Species Inhabiting the Honghaizi Wetland of Ordos, Inner Mongolia, from 2021 to 2023
Source: MDPI journal article supplement (doi:10.3390/microorganisms12050978), 2024-05-13
Supplement: s1 [file s1]

## Supplementary Materials

**Table S1. Statistics of antibiotic susceptibility testing of *Escherichia coli*.**

| Patterns of Drug Resistance | Number of Strains<br>(strains) |
|-----------------------------|--------------------------------|
| /                           | 106                            |
| TET                         | 4                              |
| ATM-PIP-TZP                 | 1                              |
| AMP-CHL-TET                 | 1                              |
| CIP-LVX-MXF-TET             | 1                              |
| CZO-CTX-FEP-AMP-PIP         | 1                              |
| CZO-CTX-FEP-ATM-AMP-PIP     | 1                              |
| AMP-PIP-STX-CIP-LVX-MXF-TET | 2                              |

Note: TET, tetracycline; ATM, Aztreonam; PIP, Piperacillin; TZP, Piperacillin-Tazobactam; AMP, Ampicillin; CHL, Chloramphenicol; CIP, Ciprofloxacin; LVX, Levofloxacin; MXF, Moxifloxacin; CZO, Cefazolin; CTX, Cefotaxime; FEP, Cefepime; /, No resistant phenotype.
