# Supplementary material for: Metagenomic and Antibiotic Resistance Analysis of the Gut Microbiota in Larus relictus and Anatidae Species Inhabiting the Honghaizi Wetland of Ordos, Inner Mongolia, from 2021 to 2023
Source: MDPI journal article supplement (doi:10.3390/microorganisms12050978), 2024-05-13
Supplement: s1 [file s1]

## Supplementary Materials

**Table S2. Biofilm production of *E. coli* isolates in microtiter plates.**

| <b>Biofilm Production</b> | <b><i>E. coli</i><br/>(<i>n</i> = 117)</b> |
|---------------------------|--------------------------------------------|
| non-adherent              | 74.4%                                      |
| weakly adherent           | 5.98%                                      |
| moderately adherent       | 18.77%                                     |
| strongly adherent         | 0.85%                                      |
