# Supplementary material for: Metagenomic and Antibiotic Resistance Analysis of the Gut Microbiota in Larus relictus and Anatidae Species Inhabiting the Honghaizi Wetland of Ordos, Inner Mongolia, from 2021 to 2023
Source: MDPI journal article supplement (doi:10.3390/microorganisms12050978), 2024-05-13
Supplement: s1 [file s1]

## Supplementary Materials

**Table S3. *E. coli* 16S rDNA primer sequences.**

| Name of Primer             | Primer Sequences<br>(5'-3')                               | Sequence<br>Fragment Size | Reference |
|----------------------------|-----------------------------------------------------------|---------------------------|-----------|
| <i>E. coli</i><br>16S rDNA | F: TGTGGGAACGGCGAGTCGGAATAC<br>R: GGGCGCAGGGGATGAAACTCAAC | 1467 bp                   | [1]       |

Note: F, forward; R, reverse.

## REFERENCES

1. Shahi SK, Singh VK, Kumar A. Detection of Escherichia coli and Associated  $\beta$ -Lactamases Genes from Diabetic Foot Ulcers by Multiplex PCR and Molecular Modeling and Docking of SHV-1, TEM-1, and OXA-1  $\beta$ -Lactamases with Clindamycin and Piperacillin-Tazobactam. *Plos One* 2013; **8**: e68234.
